# Supplementary material for: Accelerated sequence divergence of conserved genomic elements inDrosophila melanogaster
Source: HighWire-hosted journal article supplement (doi:10.1101/gr.077131.108), 2008-06-26
Supplement: SuppFigure18.pdf [file SuppFigure18.pdf]

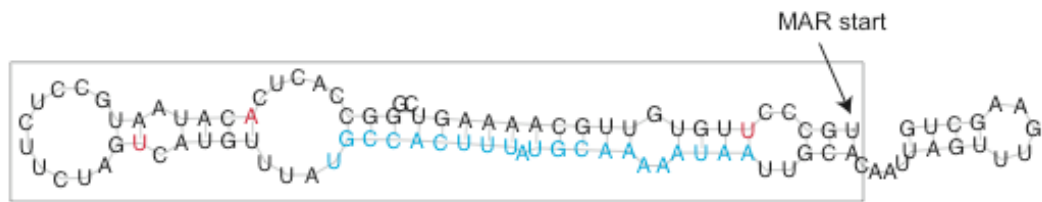

Supplementary Figure 18. Predicted structure of MAR 3R.1966842. pre-miRNA in box, miRNA in blue and *D. melanogaster*-specific substitutions in red. The MAR start arrow indicates the first base of the MAR. The following lines from Maryland, USA were identical to the *D. melanogaster* reference: 1A-1E, 1G-H, 2A-D, 2F-G, 3A-H, 4A-B, 4D-E, 4H, 5A-E, 5H, 6A-B, 6F-H, 7A-C, 7H, 8A-B, 8D-H, 9A, 9C-F, 9H, 10A, 10D-F, 10H, 11A-B, 11D, 11F-H, 12B-G. Sequences from the following lines showed single substitutions that did not influence secondary structure: 5G C→T at position 25; 2E A→G at position 74; 4C T→C at position 79 relative to the start of MAR 3R.1966842.
